# Supplementary material
Source: Springer Nature journal article supplement (https://www.springermedizin.de/resource/supplementary/12889_2013_5929_MOESM2_ESM.pdf/9496616)

**a****HUNT1 (1984-1986)**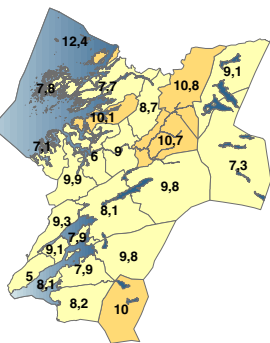**Age group**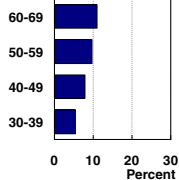**HUNT2 (1995-1997)**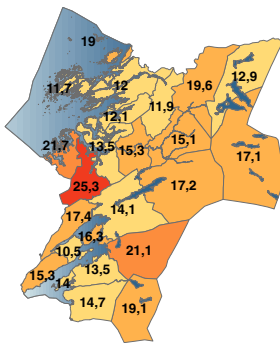**Age group**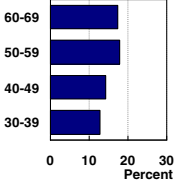**HUNT3 (2006-2008)**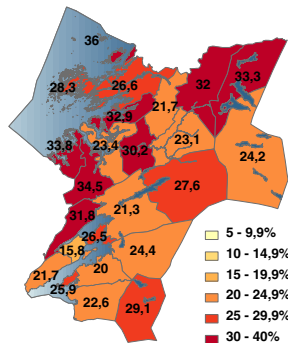**Age group**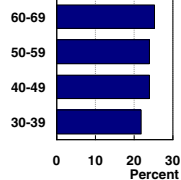**b****HUNT1 (1984-1986)**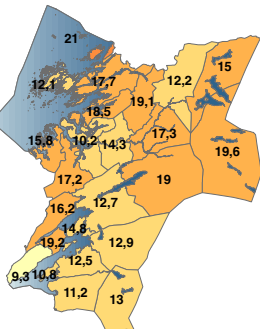**Age group**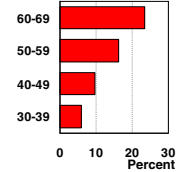**HUNT2 (1995-1997)**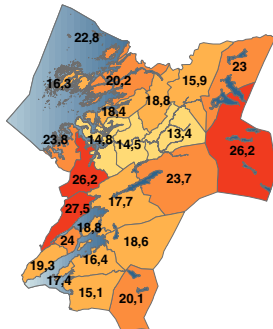**Age group**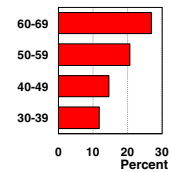**HUNT3 (2006-2008)**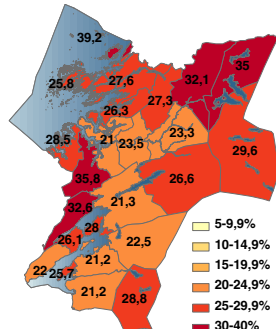**Age group**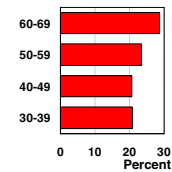

Supplement: MOESM2 [file 9496616]
